# Supplementary material
Source: PubMed Central journal article supplement (PMC4753633)
Supplement: Supp_Table1.pdf [file Supp_Table1.pdf]

## Supplementary Data

SUPPLEMENTARY TABLE S1. ANNOTATION OF BIVALENT APTAMER SEQUENCES SHOWING MODIFICATIONS BETWEEN DIFFERENT BIVALENT SPECIES

| <i>Name</i>          | <i>Sequence 5'-3'</i>                                                                                                                        | <i>Length (nt)</i> |
|----------------------|----------------------------------------------------------------------------------------------------------------------------------------------|--------------------|
| R9D-14t              | GGCGGUCGAUCACACAGUUCAAAACGUAAUAAGCCAAUGUACGAGGC<br>AGACGACUCGCC                                                                              | 58                 |
| 11F7t                | GAGAGCCCCAGCGAGAUAAUACUUGGCCCCGCUCUU                                                                                                         | 36                 |
| RNA <sub>BA</sub> 1  | <u>GGGGCGGUCGAUCACACAGUUCAAAACGUAAUAAGCCAAUGUACGAGGCA</u><br><u>GACGACUCGCCCCAAAACGUAGAGAGCCCCAGCGAGAUAAUACUUG</u><br><u>GCCCCGCUCUUACGU</u> | 111                |
| RNA <sub>BA</sub> 2  | <i>GGCGGUCGAUCACACAGUUCAAAACGUAAUAAGCCAAUGUACGAGGCAGAC</i><br><i>GACUCGCCAAAAGAGAGCCCCAGCGAGAUAAUACUUGGCCCCGCUCUU</i>                        | 97                 |
| RNA <sub>BA</sub> 3  | <i>GGGUCGAUCACACAGUUCAAAACGUAAUAAGCCAAUGUACGAGGCAGAC</i><br><i>GACUCCAAAAGCCCCAGCGAGAUAAUACUUGGCCCCGCU</i>                                   | 87                 |
| RNA <sub>BA</sub> 4  | <i>GGUCGAUCACACAGUUCAAAACGUAAUAAGCCAAUGUACGAGGCAGACGA</i><br><i>CAAAGCCCCAGCGAGAUAAUACUUGGCCCCGCU</i>                                        | 82                 |
| RNA <sub>BA</sub> 4m | <u>GGGGAUCACACAGUUCAAAACGUAAUAAGCCAAUGUACGAGGCAGA</u><br><u>CCCCAAAAGCCCCAGCGAGAUAAUACUUGGCCCCGCU</u>                                        | 81                 |

Pyrimidines (C/U) are 2'-fluoro modified, and the purines (G/A) contain 2'OH.

*Italics* indicate parent aptamer sequence.

*Underline* indicates elongation/alteration of nucleotides.

*Bold* indicates adenosine flexible linker between aptamers.

*Red color* indicates nucleotides removed near this sequence.
